# Supplementary material for: Mycobacterial Hsp65 potentially cross-reacts with autoantibodies of diabetes sera and also induces ( in vitro ) cytokine responses relevant to diabetes mellitus
Source: Royal Society of Chemistry journal article supplement (doi:10.1039/c3mb70307j), 2013-08-30
Supplement: c3mb70307j.pdf [file c3mb70307j.pdf]

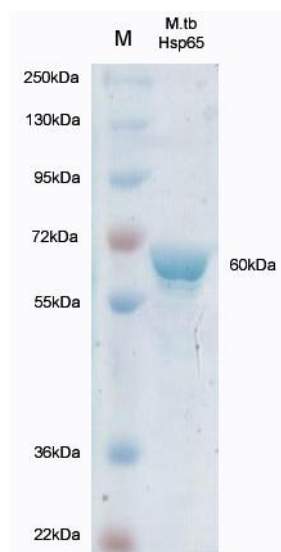

**Supplementary Fig 1.** 12 % SDS gel with marker and purified Mtb Hsp65





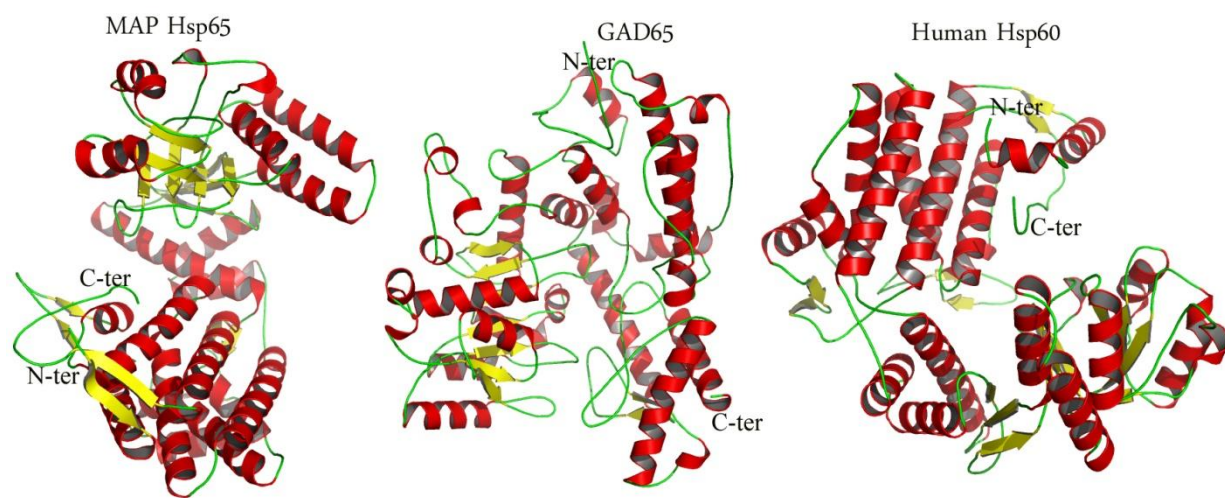

**Supplementary Fig 4.** Molecular structure of MAP Hsp65, GAD65, Human Hsp60. The secondary structural elements represented in sheet (Yellow in colour), loop (Green in colour) and helices (Red in colour).

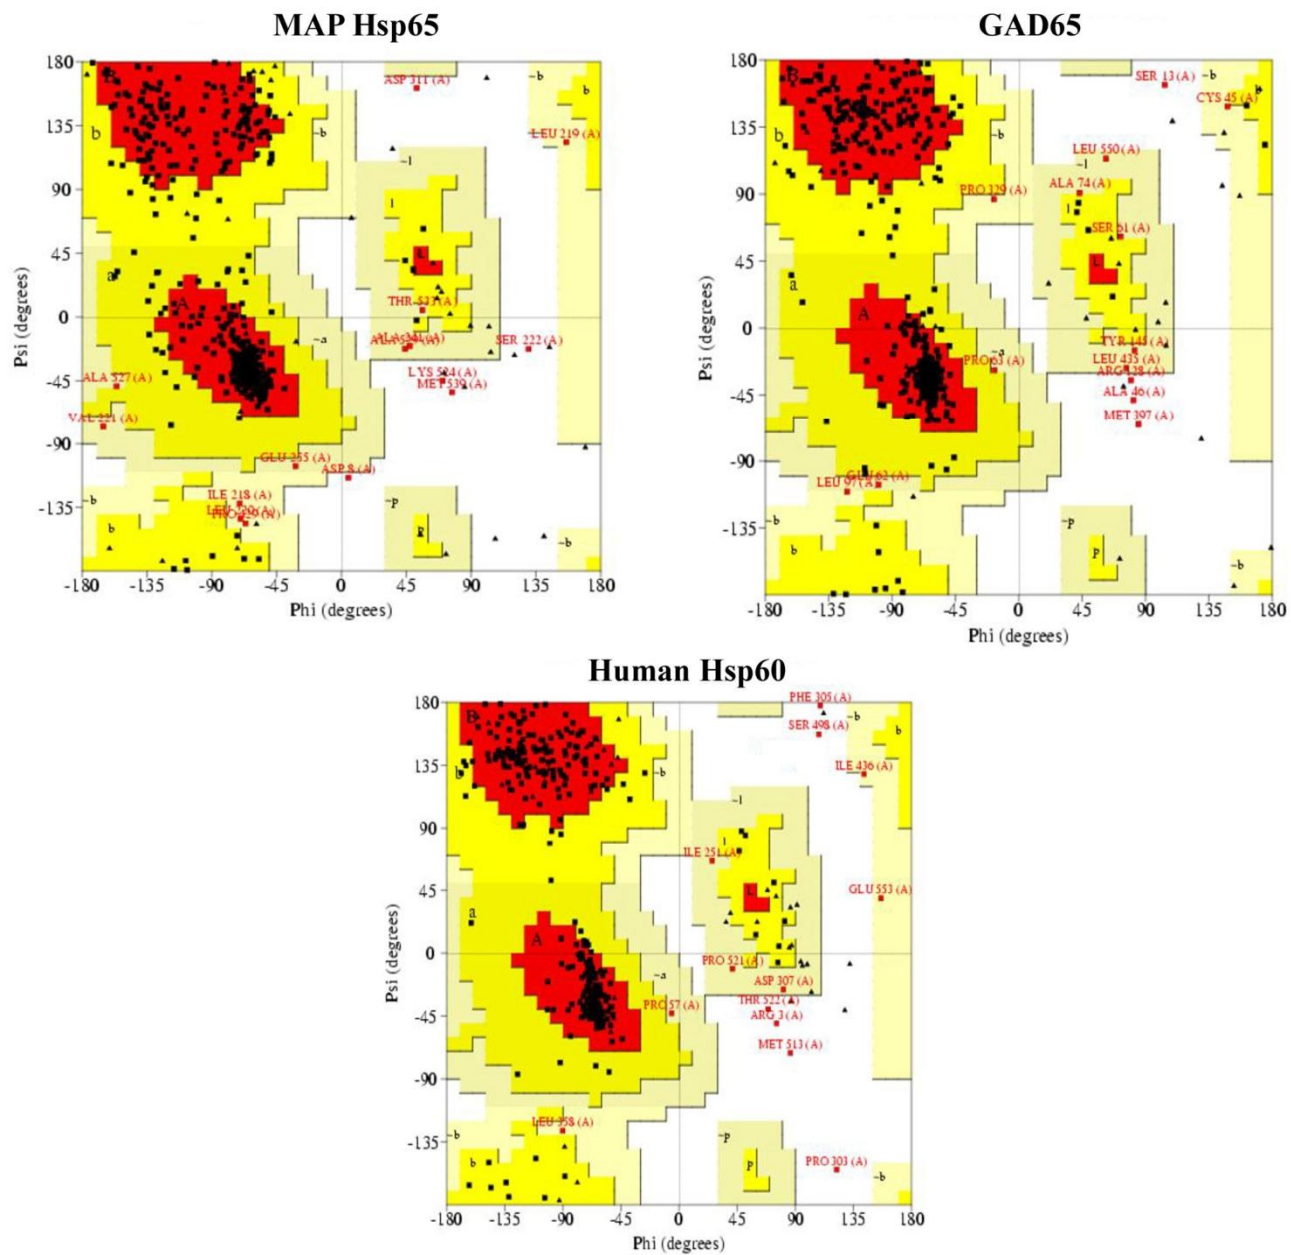

Supplementary Fig 5. Ramachandran plots for built models of MAP Hsp65, GAD65 and Human Hsp60

**Supplementary Table-1:** Statistical Analysis of ELISA

| <b>Protein/Peptide</b> | <b>U value</b> | <b>p value</b> | <b>Significance difference between Median values</b> | <b>Samples</b>   |
|------------------------|----------------|----------------|------------------------------------------------------|------------------|
| <b>M.tb Hsp65</b>      | 112.5          | p=0.0025       | Yes                                                  | Healthy and T1DM |
| <b>M.tb Hsp65</b>      | 67.5           | p<0.0001       | Yes                                                  | Healthy and T2DM |
| <b>MAP peptide-1</b>   | 53.0           | p<0.0001       | Yes                                                  | Healthy and T1DM |
| <b>MAP peptide-1</b>   | 54.50          | p<0.0002       | Yes                                                  | Healthy and T2DM |
| <b>MAP peptide-2</b>   | 67.50          | p<0.0001       | Yes                                                  | Healthy and T1DM |
| <b>MAP peptide-2</b>   | 81.50          | p<0.0001       | Yes                                                  | Healthy and T2DM |
| <b>MAP peptide-3</b>   | 40.50          | p<0.0001       | Yes                                                  | Healthy and T1DM |
| <b>MAP peptide-3</b>   | 57.0           | p<0.0001       | Yes                                                  | Healthy and T2DM |
| <b>MAP peptide-4</b>   | 7.00           | p<0.0001       | Yes                                                  | Healthy and T1DM |
| <b>MAP peptide-4</b>   | 10.50          | p<0.0001       | Yes                                                  | Healthy and T2DM |
| <b>MAP peptide-5</b>   | 230.5          | p=0.79         | No                                                   | Healthy and T1DM |
| <b>MAP peptide-5</b>   | 214.0          | p=0.518        | No                                                   | Healthy and T2DM |

**Supplementary Table-2:** T- coffee analysis with other human auto-antigens for identifying the Non- conserved peptide

| <b>S.No</b> | <b>T-Coffee analysis</b>              | <b>% identity</b> | <b>Non- conserved peptides</b> |
|-------------|---------------------------------------|-------------------|--------------------------------|
| 1.          | MAP and Human Hsp60                   | 97%               | VGLSLESADI<br>LTLNLEDVQP       |
| 2.          | MAP and GAD65                         | 45%               | VGLSLESADI<br>HKWKLS-----      |
| 3.          | MAP and Insulin                       | 62%               | VGLSLESADI<br>-----            |
| 4.          | MAP and Insulinoma associated protein | 52%               | VGLSLESADI<br>GVLGR--RV        |
| 5.          | MAP and Znt-8                         | 51%               | VGLSLESADI<br>MEGVPKSLN-       |

**Supplementary Table-3:** NetsufP prediction results for solvent accessibility for MAP Hsp65, GAD65 and Human Hsp60 (10 peptides). (Z-fit score represents the reliability of the RSA prediction).

| Protein          | Peptide             | Amino Acid | Relative Surface Accessibility (RSA) | Absolute Surface Accessibility (ASA) | Z-fit score for RSA prediction | Class assignment |
|------------------|---------------------|------------|--------------------------------------|--------------------------------------|--------------------------------|------------------|
| <b>MAP Hsp65</b> | Conserved Peptide 1 | Glu60      | 0.528                                | 92.242                               | 0.609                          | Exposed          |
|                  |                     | Leu61      | 0.146                                | 26.714                               | 0.377                          | Buried           |
|                  |                     | Glu62      | 0.628                                | 109.677                              | 1.233                          | Exposed          |
|                  |                     | Asp63      | 0.193                                | 27.869                               | 0.377                          | Buried           |
|                  |                     | Pro64      | 0.381                                | 54.135                               | -0.106                         | Exposed          |
|                  |                     | Tyr65      | 0.187                                | 39.962                               | -1.115                         | Buried           |
|                  |                     | Glu66      | 0.345                                | 60.237                               | -0.270                         | Exposed          |
|                  |                     | Lys67      | 0.388                                | 79.729                               | -0.718                         | Exposed          |
|                  |                     | Iso68      | 0.219                                | 40.515                               | 0.216                          | Buried           |
|                  |                     | Gly69      | 0.124                                | 9.790                                | -0.880                         | Buried           |
|                  |                     | Ala70      | 0.027                                | 2.964                                | -0.031                         | Buried           |
|                  |                     | Glu71      | 0.310                                | 54.140                               | 1.911                          | Exposed          |
|                  |                     | Leu72      | 0.063                                | 11.554                               | 0.956                          | Buried           |
|                  |                     | Val73      | 0.021                                | 3.258                                | 1.309                          | Buried           |
|                  |                     | Lys74      | 0.142                                | 29.148                               | 1.002                          | Buried           |
|                  | Conserved Peptide 2 | Glu75      | 0.364                                | 63.538                               | 0.684                          | Exposed          |
|                  |                     | Val76      | 0.033                                | 5.149                                | 0.460                          | Buried           |
|                  |                     | Ala77      | 0.031                                | 3.438                                | -0.654                         | Buried           |
|                  |                     | Lys78      | 0.470                                | 96.658                               | 1.688                          | Exposed          |
|                  |                     | Lys79      | 0.393                                | 80.820                               | 1.017                          | Exposed          |
|                  |                     | Asp141     | 0.669                                | 96.461                               | 0.577                          | Exposed          |
|                  |                     | Gln142     | 0.321                                | 57.295                               | 2.143                          | Exposed          |
|                  |                     | Iso143     | 0.032                                | 5.939                                | 0.535                          | Buried           |
|                  |                     | Ala144     | 0.190                                | 20.938                               | 1.413                          | Buried           |
|                  |                     | Ala145     | 0.410                                | 45.138                               | 1.220                          | Exposed          |
|                  |                     | Thr146     | 0.062                                | 8.627                                | 0.939                          | Buried           |
|                  |                     | Ala147     | 0.033                                | 3.626                                | -0.539                         | Buried           |
|                  |                     | Ala148     | 0.320                                | 35.209                               | 0.751                          | Exposed          |
|                  | Conserved Peptide 3 | Iso149     | 0.250                                | 46.250                               | 0.494                          | Buried           |
|                  |                     | Ser150     | 0.079                                | 9.235                                | -0.902                         | Buried           |
|                  |                     | Ala151     | 0.161                                | 17.731                               | -1.578                         | Buried           |
|                  |                     | Gly152     | 0.450                                | 35.384                               | -1.086                         | Exposed          |
|                  |                     | Asp153     | 0.316                                | 45.550                               | -0.488                         | Exposed          |
|                  |                     | Gln154     | 0.620                                | 110.803                              | 0.506                          | Exposed          |
|                  |                     | Ser155     | 0.397                                | 46.505                               | 1.011                          | Exposed          |
|                  |                     | Leu367     | 0.242                                | 44.237                               | -0.548                         | Buried           |
|                  |                     | Ala368     | 0.168                                | 18.547                               | -1.330                         | Buried           |
|                  |                     | Lys369     | 0.593                                | 122.00                               | -0.490                         | Exposed          |
| Leu370           | 0.298               | 54.619     | -1.148                               | Exposed                              |                                |                  |
| Ala371           | 0.524               | 57.745     | 0.898                                | Exposed                              |                                |                  |
| Gly372           | 0.460               | 36.186     | -0.667                               | Buried                               |                                |                  |
| Gly373           | 0.162               | 12.718     | 0.070                                | Buried                               |                                |                  |
| Val374           | 0.033               | 5.026      | 0.438                                | Buried                               |                                |                  |
| Ala375           | 0.020               | 2.193      | 0.977                                | Buried                               |                                |                  |
| Val376           | 0.033               | 5.026      | 0.438                                | Buried                               |                                |                  |
| Iso377           | 0.016               | 2.941      | 1.655                                | Buried                               |                                |                  |
| Lys378           | 0.081               | 16.579     | 0.691                                | Buried                               |                                |                  |
| Ala379           | 0.047               | 5.234      | 0.088                                | Buried                               |                                |                  |
| Gly380           | 0.197               | 15.480     | -0.370                               | Buried                               |                                |                  |

|              |           |        |       |         |        |         |
|--------------|-----------|--------|-------|---------|--------|---------|
|              |           | Ala381 | 0.131 | 14.392  | -1.456 | Buried  |
|              |           | Ala382 | 0.229 | 25.236  | -1.478 | Buried  |
|              |           | Thr383 | 0.236 | 32.733  | -0.277 | Buried  |
|              |           | Glu384 | 0.543 | 94.862  | 0.676  | Exposed |
|              |           | Val385 | 0.378 | 58.083  | 0.875  | Exposed |
|              |           | Glu386 | 0.124 | 21.593  | 0.936  | Buried  |
|              |           | Leu387 | 0.103 | 18.896  | 0.651  | Buried  |
|              |           | Lys388 | 0.471 | 96.905  | 1.140  | Exposed |
|              |           | Glu389 | 0.220 | 38.521  | 0.628  | Buried  |
|              |           | Arg390 | 0.080 | 18.251  | 0.789  | Buried  |
|              |           | Lys391 | 0.282 | 57.946  | 0.982  | Exposed |
|              |           | His392 | 0.313 | 56.953  | 0.702  | Exposed |
|              |           | Arg393 | 0.044 | 10.099  | 0.864  | Buried  |
|              |           | Iso394 | 0.022 | 3.977   | 0.959  | Buried  |
|              | Conserved | Ala404 | 0.045 | 4.981   | 0.047  | Buried  |
|              | Peptide 4 | Val405 | 0.135 | 20.749  | 0.502  | Buried  |
|              |           | Glu406 | 0.573 | 100.138 | 0.931  | Exposed |
|              |           | Glu407 | 0.646 | 112.909 | 0.592  | Exposed |
|              |           | Gly408 | 0.301 | 23.665  | -0.088 | Exposed |
|              |           | Iso409 | 0.081 | 15.022  | 0.397  | Buried  |
|              |           | Val410 | 0.040 | 6.163   | 0.408  | Buried  |
|              |           | Ala411 | 0.100 | 10.976  | -0.551 | Buried  |
|              |           | Gly412 | 0.076 | 5.950   | -2.329 | Buried  |
|              |           | Gly413 | 0.057 | 4.470   | -1.077 | Buried  |
|              |           | Gly414 | 0.053 | 4.140   | -0.915 | Buried  |
|              |           | Val415 | 0.035 | 5.318   | 0.113  | Buried  |
|              |           | Ala416 | 0.030 | 3.251   | 0.409  | Buried  |
|              |           | Leu417 | 0.033 | 6.116   | 0.445  | Buried  |
|              |           | Leu418 | 0.026 | 4.724   | 0.837  | Buried  |
|              |           | His419 | 0.167 | 30.395  | 1.165  | Buried  |
|              |           | Ala420 | 0.019 | 2.061   | 0.813  | Buried  |
|              |           | Iso421 | 0.069 | 12.783  | -0.201 | Buried  |
|              |           | Pro422 | 0.387 | 54.859  | 1.308  | Exposed |
|              |           | Ala423 | 0.262 | 28.916  | 1.089  | Exposed |
|              |           | Leu424 | 0.042 | 7.635   | -0.055 | Buried  |
|              |           | Leu425 | 0.491 | 70.753  | 1.081  | Exposed |
|              | Non-      | Val303 | 0.284 | 43.682  | -0.965 | Buried  |
|              | conserved | Gly304 | 0.578 | 45.520  | -0.965 | Exposed |
|              | Peptide 5 | Leu305 | 0.275 | 50.371  | -0.543 | Exposed |
|              |           | Ser306 | 0.348 | 40.739  | 0.673  | Exposed |
|              |           | Leu307 | 0.288 | 50.113  | -0.176 | Exposed |
|              |           | Glu308 | 0.627 | 109.589 | 0.588  | Exposed |
|              |           | Ser309 | 0.603 | 70.718  | 0.572  | Exposed |
|              |           | Ala310 | 0.124 | 13.676  | -0.394 | Buried  |
|              |           | Asp311 | 0.516 | 80.869  | 0.423  | Exposed |
|              |           | Iso312 | 0.209 | 38.628  | -0.157 | Buried  |
| <b>GAD65</b> | Conserved | Asp51  | 0.425 | 61.214  | -0.089 | Exposed |
|              | Peptide 1 | Ala52  | 0.549 | 60.500  | -1.091 | Exposed |
|              |           | Glu53  | 0.617 | 107.807 | -0.153 | Exposed |
|              |           | Lys54  | 0.528 | 108.527 | -0.153 | Exposed |
|              |           | Pro55  | 0.215 | 30.508  | -1.233 | Buried  |
|              |           | Ala56  | 0.475 | 52.312  | -0.499 | Exposed |
|              |           | Glu57  | 0.497 | 86.808  | -0.467 | Exposed |
|              |           | Ser58  | 0.416 | 48.802  | -1.913 | Exposed |
|              |           | Gly59  | 0.619 | 48.715  | -1.913 | Exposed |
|              |           | Gly60  | 0.571 | 44.969  | -2.152 | Exposed |



|                        |        |        |         |         |         |
|------------------------|--------|--------|---------|---------|---------|
|                        | Ser61  | 0.268  | 31.445  | -1.117  | Buried  |
|                        | Gln62  | 0.555  | 99.105  | -0.433  | Exposed |
|                        | Pro63  | 0.392  | 55.582  | -1.742  | Exposed |
|                        | Pro64  | 0.449  | 63.713  | -1.307  | Exposed |
|                        | Arg65  | 0.404  | 92.493  | -1.091  | Exposed |
|                        | Ala66  | 0.511  | 56.268  | -1.440  | Exposed |
|                        | Ala67  | 0.339  | 37.358  | -1.349  | Exposed |
|                        | Ala68  | 0.555  | 61.194  | -0.705  | Exposed |
|                        | Arg69  | 0.527  | 120.775 | -0.696  | Exposed |
|                        | Lys70  | 0.432  | 88.821  | -0.825  | Exposed |
| Conserved<br>Peptide 2 | Cys163 | 0.017  | 2.401   | 1.540   | Buried  |
|                        | Gln164 | 0.365  | 65.153  | 1.729   | Exposed |
|                        | Thr165 | 0.543  | 75.383  | 1.829   | Exposed |
|                        | Thr166 | 0.085  | 11.831  | 0.753   | Buried  |
|                        | Leu167 | 0.045  | 8.313   | 0.652   | Buried  |
|                        | Lys168 | 0.412  | 84.831  | 1.195   | Exposed |
|                        | Tyr169 | 0.370  | 79.112  | -1.105  | Exposed |
|                        | Ala170 | 0.086  | 9.499   | -2.083  | Buried  |
|                        | Iso171 | 0.049  | 9.139   | 0.005   | Buried  |
|                        | Lys172 | 0.293  | 60.352  | -0.169  | Exposed |
|                        | Thr173 | 0.142  | 19.723  | -0.874  | Buried  |
|                        | Gly174 | 0.201  | 15.811  | -1.754  | Buried  |
|                        | His175 | 0.082  | 14.934  | -0.733  | Buried  |
| Conserved<br>Peptide 3 | Pro176 | 0.050  | 7.038   | -1.120  | Buried  |
|                        | Arg177 | 0.129  | 29.495  | 0.048   | Buried  |
|                        | Leu457 | 0.082  | 15.014  | -0.658  | Buried  |
|                        | Met458 | 0.088  | 17.649  | 0.230   | Buried  |
|                        | Trp459 | 0.056  | 13.420  | 0.495   | Buried  |
|                        | Arg460 | 0.200  | 45.869  | 0.762   | Buried  |
|                        | Ala461 | 0.259  | 28.564  | -0.252  | Buried  |
|                        | Lys462 | 0.165  | 33.961  | 1.307   | Buried  |
|                        | Gly463 | 0.094  | 7.366   | -4.20   | Buried  |
|                        | Thr464 | 0.278  | 38.559  | 0.749   | Exposed |
|                        | Thr465 | 0.566  | 78.546  | 0.881   | Exposed |
|                        | Gly466 | 0.151  | 11.554  | 0.669   | Buried  |
|                        | Phe467 | 0.029  | 5.820   | 0.785   | Buried  |
|                        | Glu468 | 0.205  | 35.848  | 0.801   | Buried  |
|                        | Ala469 | 0.429  | 47.265  | 1.753   | Exposed |
|                        | His470 | 0.099  | 18.026  | 1.588   | Buried  |
|                        | Val471 | 0.018  | 2.767   | 1.434   | Buried  |
|                        | Asp472 | 0.363  | 52.366  | 1.636   | Exposed |
|                        | Lys473 | 0.403  | 82.979  | 1.259   | Exposed |
|                        | Cys474 | 0.033  | 4.689   | 0.467   | Buried  |
|                        | Leu475 | 0.074  | 13.586  | 0.910   | Buried  |
|                        | Glu476 | 0.444  | 77.514  | 1.551   | Exposed |
|                        | Leu477 | 0.084  | 15.307  | 1.101   | Buried  |
| Ala478                 | 0.013  | 1.444  | 1.496   | Buried  |         |
| Glu479                 | 0.298  | 52.043 | 1.618   | Exposed |         |
| Tyr480                 | 0.275  | 58.682 | 2.095   | Exposed |         |
| Lue481                 | 0.015  | 2.746  | 1.604   | Buried  |         |
| Tyr482                 | 0.103  | 21.947 | 0.885   | Buried  |         |
| Asn483                 | 0.489  | 71.531 | 1.811   | Exposed |         |
| Iso484                 | 0.159  | 29.507 | 1.703   | Buried  |         |
| Conserved<br>Peptide 4 | Met493 | 0.062  | 12.346  | 0.396   | Buried  |
|                        | Val494 | 0.054  | 8.284   | 0.218   | Buried  |
|                        | Phe495 | 0.131  | 26.372  | -0.008  | Buried  |

|  |                     |        |       |         |        |         |
|--|---------------------|--------|-------|---------|--------|---------|
|  |                     | Asp496 | 0.368 | 52.986  | -0.694 | Exposed |
|  |                     | Gly497 | 0.358 | 28.175  | -1.089 | Buried  |
|  |                     | Lys498 | 0.508 | 104.496 | -0.512 | Exposed |
|  |                     | Pro499 | 0.188 | 26.748  | -0.442 | Buried  |
|  |                     | Gln500 | 0.338 | 60.278  | 0.639  | Exposed |
|  |                     | His501 | 0.037 | 6.676   | -0.226 | Buried  |
|  |                     | Thr502 | 0.036 | 4.938   | -0.745 | Buried  |
|  |                     | Asn503 | 0.021 | 3.118   | 0.897  | Buried  |
|  |                     | Val504 | 0.016 | 2.521   | 1.458  | Buried  |
|  |                     | Cys505 | 0.015 | 2.036   | 1.546  | Buried  |
|  |                     | Phe506 | 0.017 | 3.412   | 1.422  | Buried  |
|  |                     | Trp507 | 0.064 | 15.488  | 0.543  | Buried  |
|  |                     | Tyr508 | 0.052 | 11.155  | 0.669  | Buried  |
|  |                     | Iso509 | 0.220 | 40.756  | 1.074  | Buried  |
|  |                     | Pro510 | 0.127 | 18.007  | -0.629 | Buried  |
|  |                     | Pro511 | 0.606 | 85.949  | -0.571 | Exposed |
|  |                     | Ser512 | 0.635 | 74.422  | -1.305 | Exposed |
|  |                     | Leu513 | 0.191 | 34.990  | -1.406 | Buried  |
|  |                     | Arg514 | 0.557 | 127.530 | -0.918 | Exposed |
|  | Conserved Peptide 1 | Asp85  | 0.394 | 56.747  | 0.244  | Exposed |
|  |                     | Leu86  | 0.387 | 70.841  | -1.014 | Exposed |
|  |                     | Lys87  | 0.587 | 120.684 | -0.528 | Exposed |
|  |                     | Asp88  | 0.364 | 52.409  | -0.712 | Exposed |
|  |                     | Lys89  | 0.376 | 77.281  | -0.054 | Exposed |
|  |                     | Tyr90  | 0.092 | 19.639  | -0.396 | Buried  |
|  |                     | Lys91  | 0.207 | 42.600  | -0.161 | Buried  |
|  |                     | Asn92  | 0.143 | 20.906  | 0.304  | Buried  |
|  |                     | Iso93  | 0.073 | 13.524  | 0.469  | Buried  |
|  |                     | Gly94  | 0.040 | 3.124   | -0.101 | Buried  |
|  |                     | Ala95  | 0.033 | 3.604   | -0.222 | Buried  |
|  |                     | Lys96  | 0.312 | 64.096  | 1.898  | Exposed |
|  |                     | Leu97  | 0.052 | 9.558   | 1.231  | Buried  |
|  |                     | Val98  | 0.025 | 3.873   | 1.091  | Buried  |
|  |                     | Gln99  | 0.159 | 28.433  | 1.081  | Buried  |
|  |                     | Asp100 | 0.372 | 53.533  | 0.886  | Exposed |
|  |                     | Val101 | 0.028 | 4.365   | 0.598  | Buried  |
|  |                     | Ala102 | 0.033 | 3.593   | -0.713 | Buried  |
|  |                     | Asn103 | 0.468 | 68.544  | 1.731  | Exposed |
|  |                     | Asn104 | 0.375 | 54.900  | 1.046  | Exposed |
|  | Conserved Peptide 2 | Glu166 | 0.660 | 115.250 | 0.522  | Exposed |
|  |                     | Glu167 | 0.169 | 29.524  | 1.569  | Buried  |
|  |                     | Iso168 | 0.070 | 12.876  | -0.052 | Buried  |
|  |                     | Ala169 | 0.312 | 34.382  | 1.284  | Exposed |
|  |                     | Gln170 | 0.262 | 46.754  | 1.396  | Exposed |
|  |                     | Val171 | 0.040 | 6.133   | 0.960  | Buried  |
|  |                     | Ala172 | 0.097 | 10.678  | -0.337 | Buried  |
|  |                     | Thr173 | 0.271 | 37.574  | 1.112  | Exposed |
|  |                     | Iso174 | 0.062 | 11.544  | 0.388  | Buried  |
|  |                     | Ser175 | 0.150 | 17.545  | -0.940 | Buried  |
|  |                     | Ala176 | 0.293 | 32.245  | -1.159 | Buried  |
|  |                     | Asn177 | 0.418 | 61.195  | -0.921 | Exposed |
|  |                     | Gly178 | 0.370 | 29.150  | -1.637 | Exposed |
|  |                     | Asp179 | 0.465 | 67.079  | -0.123 | Exposed |
|  |                     | Lys180 | 0.624 | 128.254 | -0.056 | Exposed |
|  |                     | Glu181 | 0.409 | 71.522  | 0.948  | Exposed |
|  | Conserved           | Leu394 | 0.173 | 31.603  | -0.434 | Buried  |

|                                |                        |        |         |         |         |
|--------------------------------|------------------------|--------|---------|---------|---------|
| Peptide 3                      | Ala395                 | 0.060  | 6.656   | -0.893  | Buried  |
|                                | Lys396                 | 0.441  | 90.673  | -0.179  | Exposed |
|                                | Leu397                 | 0.276  | 50.609  | -0.979  | Buried  |
|                                | Ser398                 | 0.515  | 60.346  | -1.127  | Exposed |
|                                | Asp399                 | 0.524  | 75.566  | -0.881  | Exposed |
|                                | Gly400                 | 0.162  | 12.773  | -0.100  | Buried  |
|                                | Val401                 | 0.047  | 7.239   | 0.168   | Buried  |
|                                | Ala402                 | 0.020  | 2.259   | 0.876   | Buried  |
|                                | Val403                 | 0.040  | 6.133   | 0.373   | Buried  |
|                                | Leu404                 | 0.014  | 2.563   | 1.750   | Buried  |
|                                | Lys405                 | 0.068  | 13.988  | 0.633   | Buried  |
|                                | Val406                 | 0.023  | 3.566   | 0.748   | Buried  |
|                                | Gly407                 | 0.152  | 11.947  | -0.254  | Buried  |
|                                | Gly408                 | 0.070  | 5.548   | -1.956  | Buried  |
|                                | Thr409                 | 0.192  | 26.700  | -1.289  | Buried  |
|                                | Ser410                 | 0.155  | 18.213  | -0.491  | Buried  |
|                                | Asp411                 | 0.514  | 74.096  | 0.391   | Exposed |
|                                | Val412                 | 0.412  | 63.355  | 0.037   | Exposed |
|                                | Glu413                 | 0.155  | 27.148  | 0.697   | Buried  |
|                                | Val414                 | 0.140  | 21.533  | 0.560   | Buried  |
|                                | Asn415                 | 0.560  | 81.955  | 1.321   | Exposed |
|                                | Glu416                 | 0.290  | 50.715  | 0.512   | Exposed |
|                                | Lys417                 | 0.089  | 18.348  | 0.521   | Buried  |
|                                | Lys418                 | 0.268  | 55.169  | 1.086   | Exposed |
|                                | Asp419                 | 0.378  | 54.470  | 0.768   | Exposed |
|                                | Arg420                 | 0.053  | 12.183  | 0.996   | Buried  |
|                                | Val421                 | 0.021  | 3.182   | 1.071   | Buried  |
|                                | Conserved<br>Peptide 4 | Ala431 | 0.038   | 4.133   | -0.091  |
| Val432                         |                        | 0.129  | 19.889  | 0.349   | Buried  |
| Glu433                         |                        | 0.579  | 101.151 | 0.483   | Exposed |
| Glu434                         |                        | 0.597  | 104.278 | 0.113   | Exposed |
| Gly435                         |                        | 0.276  | 21.690  | -0.291  | Buried  |
| Iso436                         |                        | 0.125  | 23.181  | 0.538   | Buried  |
| Val437                         |                        | 0.030  | 4.534   | -2.592  | Buried  |
| Leu438                         |                        | 0.063  | 11.590  | -0.658  | Buried  |
| Gly439                         |                        | 0.058  | 4.557   | 0.317   | Buried  |
| Gly440                         |                        | 0.051  | 4.029   | -1.232  | Buried  |
| Gly441                         |                        | 0.050  | 3.896   | -1.320  | Buried  |
| Cys442                         |                        | 0.031  | 4.366   | 0.370   | Buried  |
| Ala443                         |                        | 0.026  | 2.854   | 0.688   | Buried  |
| Leu444                         |                        | 0.031  | 5.713   | 0.715   | Buried  |
| Leu445                         |                        | 0.031  | 5.768   | 0.592   | Buried  |
| Arg446                         |                        | 0.142  | 32.632  | 1.209   | Buried  |
| Cys447                         |                        | 0.018  | 2.569   | 0.987   | Buried  |
| Iso448                         |                        | 0.062  | 11.562  | 0.171   | Buried  |
| Pro449                         |                        | 0.386  | 54.802  | 1.275   | Exposed |
| Ala450                         |                        | 0.215  | 23.715  | 1.102   | Buried  |
| Leu451                         | 0.034                  | 6.299  | -0.488  | Buried  |         |
| Asp452                         | 0.501                  | 72.266 | 0.840   | Exposed |         |
| Non-<br>Conserved<br>Peptide 5 | Leu330                 | 0.440  | 80.601  | -1.542  | Exposed |
|                                | Thr331                 | 0.421  | 58.420  | -1.426  | Exposed |
|                                | Leu332                 | 0.375  | 68.736  | -1.323  | Exposed |
|                                | Asn333                 | 0.396  | 57.945  | 0.098   | Exposed |
|                                | Leu334                 | 0.129  | 23.528  | -1.193  | Buried  |
|                                | Glu335                 | 0.487  | 85.096  | -0.090  | Exposed |
| Asp336                         | 0.539                  | 77.699 | 0.590   | Exposed |         |

|        |       |        |       |         |
|--------|-------|--------|-------|---------|
| Val337 | 0.057 | 8.792  | 0.590 | Buried  |
| Gln338 | 0.347 | 62.064 | 0.875 | Exposed |
| Pro339 | 0.340 | 48.303 | 0.242 | Exposed |

**Supplementary Table-4:** Amino acids involved in core/allowed and disallowed regions of Ramachandran Plot

| S.No. | Protein     | Ramachandran Plot Regions                                                                           |                                        |
|-------|-------------|-----------------------------------------------------------------------------------------------------|----------------------------------------|
|       |             | Core/Allowed region amino acid Number                                                               | Disallowed Region Amino acids          |
| 1     | MAP Hsp65   | Met1 to Val221, Ser223 to Ala310, Ile312 to Glu523, Ala525 to Gly538, Asp540 and Phe541             | Ser222, Asp 311, Lys524 and Met 539    |
| 2     | GAD65       | Met1 to Gly12, Glu14 to Ala27, Ala29 to Cys45, Leu47 to Lys396, Meth398 to Leu585                   | Ser13, Arg28, Ala46, and Meth397       |
| 3     | Human Hsp60 | Met1, Leu2, Leu4 to Gly 304, Gly306 to Ser447, Ser449 to Asn512, Val514 to Pro521, Lys523 to Phe573 | Arg3, Phe305, Ser498, Meth513, Thr522. |
